# Supplementary material for: Comparative genome and methylome analysis reveals restriction/modification system diversity in the gut commensal Bifidobacterium breve
Source: PubMed Central journal article supplement — Nucleic Acids Res. 2017 Dec 27;46(4):1860–77. doi: 10.1093/nar/gkx1289 (PMC5829577; doi:10.1093/nar/gkx1289), 2017-12-27
Supplement: gkx1289_supp.pdf [file gkx1289_supp.pdf]

## SUPPLEMENTARY MATERIAL

### LEGENDS TO FIGURES

#### **Figure S1. Synteny conservation across *B. breve*.**

Dotplot alignments of the sequenced strains in this study showing the synteny conservation across this species.

#### **Figure S2. Comparison of synteny conservation between *B. breve* and *B. longum*.**

Dotplot alignments showing the conservation of genome synteny between representatives of *B. longum* species compared to the reference strain *B. breve* UCC2003. Chromosomal inversions are highlighted with green circles, while flanking genes are also indicated.

#### **Figure S3. Truncated R/M systems in *B. breve*.**

Locus maps showing gene organization and comparison of partially functional R/M systems belonging to RM7-COG and RM8-COG, as predicted within this study. Genes are indicated as arrows and are coloured based on their predicted function. Percentage of similarity in BLASTP alignment across homologous genes is indicated. A red star (\*) shows what is predicted to be the truncated RE-encoding gene in these systems.

**Figure S4. Sequence homology between RM10 and RM14.**

Locus map displaying the sequence homology observed between RM10 and RM14. Genes are indicated as arrows coloured based on the predicted function. BLASTP similarity is also indicated.

**Figure S5. Restriction of *B. breve* selected strains with commercially available enzymes for methylome assessment.**

Restriction of gDNA obtained from selected *B. breve* strains (*B. breve* NRBB01, *B. breve* NRBB02, *B. breve* NRBB57, *B. breve* NRBB04, *B. breve* 180W8-3 and *B. breve* NRBB52) with commercially available restriction enzymes as confirmation of the predicted methylome.

**Table S1.** Bifidobacteria used for Comparative Genomics Hybridization analysis.

|    | <b>Strain name</b>                                                    | <b>Source</b>                            | <b>16S<br/>similarity</b> | <b>CGH family</b> |
|----|-----------------------------------------------------------------------|------------------------------------------|---------------------------|-------------------|
| 1  | <i>Bifidobacterium breve</i> UCC2003                                  | Infant isolate, (Breast fed)             | 100%                      | 1                 |
| 2  | <i>Bifidobacterium breve</i> NRBB39                                   | Infant isolate, NCIMB 8807               | 99%                       | 1                 |
| 3  | <i>Bifidobacterium breve</i> NRBB38                                   | Infant isolate, LMG 11040                | 99%                       | 1                 |
| 4  | <i>Bifidobacterium breve</i> B8815                                    | Infant isolate, NCIMB8815                | 99%                       | 2                 |
| 5  | <i>Bifidobacterium breve</i> NRBB56                                   | Infant isolate, NIZO 658                 | 99%                       | 2                 |
| 6  | <i>Bifidobacterium bifidum</i> NRBB05                                 | Infant isolate (Breast Fed)              | 99%                       | 3                 |
| 7  | <i>Bifidobacterium bifidum</i> NRBB10                                 | Infant isolate (Breast Fed)              | 99%                       | 3                 |
| 8  | <i>Bifidobacterium pseudolongum</i> subsp. <i>pseudolongum</i> NRBB06 | Unknown                                  | 100%                      | 3                 |
| 9  | <i>Bifidobacterium animalis</i> subsp. <i>animalis</i> NRBB17         | Human isolate                            | 99%                       | 3                 |
| 10 | <i>Bifidobacterium bifidum</i> NRBB16                                 | Infant isolate (Breast Fed)              | 99%                       | 3                 |
| 11 | <i>Bifidobacterium bifidum</i> 017W4-21                               | Infant isolate (Breast Fed)              | 99%                       | 3                 |
| 12 | <i>Bifidobacterium breve</i> NRBB15                                   | Infant isolate, ATCC 15701               | 99%                       | 4                 |
| 13 | <i>Bifidobacterium breve</i> B7017                                    | Human isolate, JCM 7017                  | 99%                       | 4                 |
| 14 | <i>Bifidobacterium breve</i> B7019                                    | Infant isolate, JCM 7019                 | 99%                       | 5                 |
| 15 | <i>Bifidobacterium breve</i> NRBB42                                   | Infant isolate                           | 99%                       | 5                 |
| 16 | <i>Bifidobacterium breve</i> BUCC2005                                 | Infant isolate                           | 99%                       | 5                 |
| 17 | <i>Bifidobacterium breve</i> NRBB43                                   | Infant Isolate                           | 99%                       | 6                 |
| 18 | <i>Bifidobacterium breve</i> NRBB52                                   | Infant isolate (Breast Fed), subject 903 | 99%                       | 6                 |
| 19 | <i>Bifidobacterium breve</i> NRBB44                                   | Human milk isolate                       | 99%                       | 7                 |
| 20 | <i>Bifidobacterium breve</i> DRBB27                                   | Infant Isolate                           | 99%                       | 7                 |
| 21 | <i>Bifidobacterium breve</i> DRBB29                                   | Infant Isolate                           | 99%                       | 7                 |
| 22 | <i>Bifidobacterium breve</i> DRBB25                                   | Adult Isolate                            | 99%                       | 8                 |
| 23 | <i>Bifidobacterium breve</i> DRBB30                                   | Infant Isolate                           | 99%                       | 8                 |
| 24 | <i>Bifidobacterium breve</i> CNCM I-4321                              | Child isolate CNCM I-4321                | 99%                       | 8                 |
| 25 | <i>Bifidobacterium breve</i> B12L                                     | Human milk isolate                       | 99%                       | 8                 |

|    |                                        |                                                     |     |    |
|----|----------------------------------------|-----------------------------------------------------|-----|----|
| 26 | <i>Bifidobacterium breve</i> 215W4-47a | Infant isolate                                      | 99% | 9  |
| 27 | <i>Bifidobacterium breve</i> NRBB07    | Infant isolate (Breast Fed) Subject 3               | 99% | 10 |
| 28 | <i>Bifidobacterium breve</i> NRBB09    | Infant isolate (Breast Fed) Subject 3               | 99% | 10 |
| 29 | <i>Bifidobacterium breve</i> NRBB12    | Infant isolate (Breast Fed) Subject 6               | 99% | 11 |
| 30 | <i>Bifidobacterium breve</i> NRBB11    | Infant isolate (Breast Fed) Subject 6               | 99% | 11 |
| 31 | <i>Bifidobacterium breve</i> NRBB13    | Infant isolate (Breast Fed) Subject 6               | 99% | 11 |
| 32 | <i>Bifidobacterium breve</i> NRBB14    | Infant isolate (Breast Fed) Subject 6               | 99% | 11 |
| 33 | <i>Bifidobacterium breve</i> NRBB57    | Infant isolate, BbC50 (used in Infant Milk Formula) | 99% | 12 |
| 34 | <i>Bifidobacterium breve</i> NRBB03    | Infant isolate                                      | 99% | 12 |
| 35 | <i>Bifidobacterium breve</i> NRBB53    | Infant isolate (Breast Fed)                         | 99% | 12 |
| 36 | <i>Bifidobacterium breve</i> NRBB50    | Infant isolate (Breast Fed) Subject 903             | 99% | 13 |
| 37 | <i>Bifidobacterium breve</i> NRBB35    | Human Isolate                                       | 99% | 13 |
| 38 | <i>Bifidobacterium breve</i> NRBB51    | Infant isolate (Breast Fed)                         | 99% | 13 |
| 39 | <i>Bifidobacterium breve</i> NRBB55    | Infant isolate (Breast Fed)                         | 99% | 13 |
| 40 | <i>Bifidobacterium breve</i> 165W4-19  | Infant isolate                                      | 99% | 13 |
| 41 | <i>Bifidobacterium breve</i> B461      | Human isolate B461                                  | 99% | 14 |
| 42 | <i>Bifidobacterium breve</i> DRBB26    | Child isolate                                       | 99% | 15 |
| 43 | <i>Bifidobacterium breve</i> NRBB36    | Human Isolate                                       | 99% | 16 |
| 44 | <i>Bifidobacterium breve</i> NRBB48    | Human Isolate                                       | 99% | 16 |
| 45 | <i>Bifidobacterium breve</i> BUCC2004  | Human isolate                                       | 99% | 16 |
| 46 | <i>Bifidobacterium breve</i> NRBB46    | Infant isolate                                      | 99% | 17 |
| 47 | <i>Bifidobacterium breve</i> NRBB01    | Infant isolate                                      | 99% | 17 |
| 48 | <i>Bifidobacterium breve</i> B2257     | Infant isolate, NCFB 2257                           | 99% | 17 |
| 49 | <i>Bifidobacterium breve</i> NRBB41    | Human isolate (CCUG 47591)                          | 99% | 18 |
| 50 | <i>Bifidobacterium breve</i> NRBB04    | Infant isolate, ATCC 15698                          | 99% | 18 |
| 51 | <i>Bifidobacterium breve</i> B2258     | Infant isolate, NCFB 2258                           | 99% | 18 |
| 52 | <i>Bifidobacterium breve</i> B689b     | Infant isolate                                      | 99% | 19 |
| 53 | <i>Bifidobacterium breve</i> NRBB25    | Infant Isolate Subject 1 (Formula Fed)              | 99% | 20 |

|    |                                       |                                        |      |    |
|----|---------------------------------------|----------------------------------------|------|----|
| 54 | <i>Bifidobacterium breve</i> NRBB21   | Infant Isolate Subject 1 (Formula Fed) | 99%  | 20 |
| 55 | <i>Bifidobacterium breve</i> NRBB20   | Infant Isolate Subject 1 (Formula Fed) | 99%  | 20 |
| 56 | <i>Bifidobacterium breve</i> NRBB30   | Infant Isolate Subject 1 (Formula Fed) | 99%  | 20 |
| 57 | <i>Bifidobacterium breve</i> NRBB24   | Infant Isolate Subject 1 (Formula Fed) | 99%  | 20 |
| 58 | <i>Bifidobacterium breve</i> NRBB02   | Infant Isolate Subject 1 (Formula Fed) | 99%  | 20 |
| 59 | <i>Bifidobacterium breve</i> NRBB08   | Infant Isolate Subject 1 (Formula Fed) | 99%  | 20 |
| 60 | <i>Bifidobacterium breve</i> NRBB23   | Infant Isolate Subject 1 (Formula Fed) | 100% | 20 |
| 61 | <i>Bifidobacterium breve</i> NRBB26   | Infant Isolate Subject 1 (Formula Fed) | 99%  | 20 |
| 62 | <i>Bifidobacterium breve</i> NRBB27   | Infant Isolate Subject 1 (Formula Fed) | 99%  | 20 |
| 63 | <i>Bifidobacterium breve</i> NRBB29   | Infant Isolate Subject 1 (Formula Fed) | 99%  | 20 |
| 64 | <i>Bifidobacterium breve</i> NRBB31   | Infant Isolate Subject 1 (Formula Fed) | 99%  | 20 |
| 65 | <i>Bifidobacterium breve</i> NRBB19   | Infant Isolate Subject 1 (Formula Fed) | 99%  | 20 |
| 66 | <i>Bifidobacterium breve</i> NRBB18   | Infant Isolate Subject 1 (Formula Fed) | 99%  | 20 |
| 67 | <i>Bifidobacterium breve</i> NRBB28   | Infant Isolate Subject 1 (Formula Fed) | 99%  | 20 |
| 68 | <i>Bifidobacterium breve</i> NRBB49   | Infant Isolate Subject 1 (Formula Fed) | 99%  | 20 |
| 69 | <i>Bifidobacterium breve</i> 082W4-8  | Infant isolate (Breast Fed)            | 99%  | 21 |
| 70 | <i>Bifidobacterium breve</i> 139W4-23 | Infant isolate                         | 99%  | 22 |
| 71 | <i>Bifidobacterium breve</i> 200W4-13 | Infant isolate                         | 99%  | 22 |
| 72 | <i>Bifidobacterium breve</i> 144W4-15 | Infant isolate                         | 99%  | 23 |
| 73 | <i>Bifidobacterium breve</i> 180W8-3  | Infant isolate                         | 99%  | 23 |
| 74 | <i>Bifidobacterium breve</i> 017W4-39 | Infant isolate                         | 99%  | 23 |
| 75 | <i>Bifidobacterium breve</i> DRBB28   | Infant Isolate                         | 99%  | 24 |
| 76 | <i>Bifidobacterium breve</i> DRBB31   | Child Isolate                          | 99%  | 24 |
| 77 | <i>Bifidobacterium breve</i> NRBB54   | Infant isolate (Breast Fed)            | 99%  | 24 |

NCIMB: National Collection of Industrial and Marine Bacteria, Aberdeen, UK, NCFB, National Collection of Food Bacteria; NCTC, National Collection of Type Cultures; NCIMB, National Collection of Industrial and Marine Bacteria; JCM: Japanese Collection of Microorganisms; UCC, University College Cork culture collection; Nizo, Nizo food research.

**Table S2.** R/M systems in *B. breve* with assigned nomenclature and cluster of orthology.

| Genome        | R/M<br>COG ID | Locus_tag   | Size<br>(aa) | Gene | Type     | Name             | Predicted recognition sequence |
|---------------|---------------|-------------|--------------|------|----------|------------------|--------------------------------|
| <b>NRBB01</b> | RM1a          | NRBB01_1469 | 245          | S    | I        | S1.Bbr01IIP      | ?                              |
|               | RM1a          | NRBB01_1471 | 365          | S    | I        | S2.Bbr01IIP      | ?                              |
|               | RM1a          | NRBB01_1472 | 167          | S    | I        | S3.Bbr01IIP      | ?                              |
|               | RM1a          | NRBB01_1473 | 502          | M    | I gamma  | M.Bbr01II        | GC <sup>m6</sup> ANNNNNNTGC    |
|               | RM1a          | NRBB01_1474 | 1039         | R    | I        | Bbr01ORF1473P    | GCANNNNNNTGC                   |
|               | RM3           | NRBB01_0329 | 431          | R    | II       | Bbr01IP          | (GATC)                         |
|               | RM3           | NRBB01_0330 | 276          | M    | II alpha | M.Bbr01I         | G <sup>m6</sup> ATC            |
|               | RM16          | NRBB01_0727 | 910          | RM   | II G     | Bbr01ORF727P     | -                              |
|               | RM9           | NRBB01_1139 | 321          | M    | II alpha | M.Bbr01ORF1139P  | (TGG <sup>m4</sup> CCA)        |
|               | RM7           | NRBB01_1317 | 361          | M    | II       | M1.Bbr01ORF1317P | -                              |
|               | MT1           | NRBB01_1319 | 160          | M    | II gamma | M2.Bbr01ORF1317P | -                              |
| <b>NRBB02</b> | RM8           | NRBB02_0220 | 263          | R    | II       | R1.Bbr02IIP      | (GGCGCC)                       |
|               | RM8           | NRBB02_0224 | 305          | R    | II       | R2.Bbr02IIP      | (GGCGCC)                       |
|               | RM8           | NRBB02_0225 | 392          | M    | II       | M.Bbr02II        | GG <sup>m5</sup> CGCC          |
|               | RM3           | NRBB02_0408 | 431          | R    | II       | Bbr02I           | GATC                           |
|               | RM3           | NRBB02_0409 | 276          | M    | II alpha | M.Bbr02I         | G <sup>m6</sup> ATC            |
| <b>NRBB04</b> | RM8           | NRBB04_0189 | 263          | R    | II       | R1.Bbr04ORF194P  | (GGCGCC)                       |
|               | RM8           | NRBB04_0193 | 305          | R    | II       | R2.Bbr04ORF194P  | (GGCGCC)                       |
|               | RM8           | NRBB04_0194 | 392          | M    | II       | M.Bbr04ORF194P   | (GG <sup>m5</sup> CGCC)        |
|               | RM3           | NRBB04_0355 | 431          | R    | II       | Bbr04IP          | (GATC)                         |
|               | RM3           | NRBB04_0356 | 276          | M    | II       | M.Bbr04I         | G <sup>m6</sup> ATC            |
| <b>NRBB09</b> | RM4           | NRBB09_0015 | 231          | M    | II       | M.Bbr09I         | RG <sup>m6</sup> ATCY          |
|               | RM4           | NRBB09_0016 | 252          | R    | II       | Bbr09I           | RGATCY                         |
| <b>NRBB11</b> | RM10          | NRBB11_0942 | 627          | M    | II alpha | M.Bbr11ORF942P   | (GTCG <sup>m6</sup> AG)        |
|               | RM7           | NRBB11_1113 | 480          | R    | II       | Bbr11ORF1113P    | (CCWGG)                        |

|               |      |             |      |    |              |                 |                                                           |
|---------------|------|-------------|------|----|--------------|-----------------|-----------------------------------------------------------|
|               | RM15 | NRBB11_1481 | 1103 | RM | II G,S,alpha | Bbr11I          | GGRC <sup>m6</sup> AG                                     |
| <b>NRBB50</b> | RM6  | NRBB50_0937 | 910  | RM | II G         | Bbr50ORF937P    | -                                                         |
|               | RM6  | NRBB50_1129 | 473  | R  | II           | Bbr50IP         | (CCWGG)                                                   |
|               | RM16 | NRBB50_1130 | 441  | M  | II           | M.Bbr50I        | C <sup>m5</sup> CWGG                                      |
| <b>NRBB51</b> | RM2c | NRBB51_0178 | 1014 | R  | I            | Bbr51ORF183P    | -                                                         |
|               | RM2c | NRBB51_0180 | 165  | S  | I            | S1.Bbr51ORF183P | ?                                                         |
|               | RM2c | NRBB51_0181 | 215  | S  | I            | S2.Bbr51ORF183P | ?                                                         |
|               | RM2c | NRBB51_0183 | 520  | M  | I gamma      | M.Bbr51ORF183P  | (CC <sup>m6</sup> ANNNNNNNNTGG)                           |
|               | RM2c | NRBB51_1104 | 698  | M  | I gamma      | M.Bbr51ORF1104P | (CC <sup>m6</sup> ANNNNNNNNTGG)                           |
|               | RM2c | NRBB51_1105 | 397  | S  | I            | S.Bbr51ORF1104P | ?                                                         |
|               | RM7  | NRBB51_1083 | 422  | R  | II           | Bbr51IIP        | (CCWGG)                                                   |
|               | RM7  | NRBB51_1084 | 323  | M  | II           | M.Bbr51II       | C <sup>m5</sup> CWGG                                      |
|               | RM15 | NRBB51_1584 | 1110 | RM | II G,S,alpha | Bbr51I          | (GGCG <sup>m6</sup> AG and perhaps GGRC <sup>m6</sup> AG) |
| <b>NRBB52</b> | RM4  | NRBB52_0014 | 231  | M  | II           | M.Bbr52I        | RG <sup>m6</sup> ATCY                                     |
|               | RM4  | NRBB52_0015 | 252  | R  | II           | Bbr52I          | RGATCY                                                    |
|               | RM15 | NRBB52_1542 | 1110 | RM | II G,S,alpha | Bbr52II         | GGCG <sup>m6</sup> AG                                     |
| <b>NRBB56</b> | RM8  | NRBB56_0222 | 263  | R  | II           | R1.Bbr56IP      | (GGCGCC)                                                  |
|               | RM8  | NRBB56_0226 | 305  | R  | II           | R2.Bbr56IP      | (GGCGCC)                                                  |
|               | RM8  | NRBB56_0227 | 392  | M  | II           | M.Bbr56I        | GG <sup>m5</sup> CGCC                                     |
|               | RM11 | NRBB56_1180 | 315  | R  | II           | Bbr56IIP        | (CTGCAG)                                                  |
|               | RM11 | NRBB56_1181 | 467  | M  | II gamma     | M.Bbr56II       | CTGC <sup>m6</sup> AG                                     |
|               | RM12 | NRBB56_1182 | 695  | R  | II           | Bbr56IIP        | (GTCGAC)                                                  |
|               | RM12 | NRBB56_1183 | 349  | M  | II           | M.Bbr56III      | GT <sup>m5</sup> CGAC                                     |
| <b>NRBB57</b> | RM2a | NRBB57_1685 | 1096 | R  | I            | Bbr57IP         | (RAYCNNNNNCTG)                                            |
|               | RM2a | NRBB57_1687 | 419  | S  | I            | S1.Bbr57I       | RAYNNNNNCTG                                               |
|               | RM2a | NRBB57_1688 | 855  | M  | I gamma      | M.Bbr57I        | R <sup>m6</sup> AYCNNNNNCTG                               |
|               | RM2a | NRBB57_1690 | 280  | S  | I            | S2.Bbr57IP      | -                                                         |
|               | RM2a | NRBB57_1692 | 251  | S  | I            | S3.Bbr57IP      | -                                                         |

|                    |      |                |      |    |              |                    |                                               |
|--------------------|------|----------------|------|----|--------------|--------------------|-----------------------------------------------|
|                    | RM6  | NRBB57_0729    | 476  | R  | II           | Bbr57ORF730P       | -                                             |
|                    | RM6  | NRBB57_0730    | 448  | M  | II           | M.Bbr57ORF730P     | (CCWGG)                                       |
|                    | MT7  | NRBB57_0962    | 633  | M  | II gamma     | M.Bbr57ORF962P     | -                                             |
|                    | RM14 | NRBB57_0969    | 1206 | RM | II G,S,alpha | Bbr57III           | GTRA <sup>m6</sup> AYG                        |
|                    | RM13 | NRBB57_1093    | 932  | RM | II G,S,gamma | Bbr57II            | GAGG <sup>m6</sup> AC                         |
|                    | MT2  | NRBB57_1229    | 885  | M  | II           | M.Bbr57ORF1229P    | -                                             |
|                    | MT5  | NRBB57_1238    | 426  | M  | II beta      | M.Bbr57ORF1238P    | -                                             |
|                    | MT3  | NRBB57_1276    | 327  | M  | II           | M.Bbr57ORF1276P    | -                                             |
| <b>CNCM I-4321</b> | RM4  | CNCMI4321_0016 | 231  | M  | II           | M.Bbr4321I         | RG <sup>m6</sup> A <u>T</u> CY                |
|                    | RM4  | CNCMI4321_0017 | 252  | R  | II           | Bbr4321IP          | (RGATCY)                                      |
|                    | RM9  | CNCMI4321_1238 | 321  | M  | II alpha     | M.Bbr4321ORF1238P  | (TGG <sup>m4</sup> CCA)                       |
|                    | MT6  | CNCMI4321_1398 | 152  | M  | II           | M.Bbr4321ORF1398P  | -                                             |
|                    | MT1  | CNCMI4321_1413 | 160  | M  | II gamma     | M.Bbr4321ORF1413P  | -                                             |
|                    | RM1b | CNCMI4321_1557 | 265  | S  | I            | S1.Bbr4321ORF1561P | ?                                             |
|                    | RM1b | CNCMI4321_1559 | 386  | S  | I            | S2.Bbr4321ORF1561P | ?                                             |
|                    | RM1b | CNCMI4321_1560 | 181  | S  | I            | S3.Bbr4321ORF1561P | ?                                             |
|                    | RM1b | CNCMI4321_1561 | 502  | M  | I gamma      | M.Bbr4321ORF1561P  | CC <sup>m6</sup> A <u>Y</u> NNNNNG <u>T</u> C |
|                    | RM1b | CNCMI4321_1562 | 1039 | R  | I            | Bbr4321ORF1561P    | -                                             |
| <b>DRBB26</b>      | RM8  | DRBB26_0203    | 263  | R  | II           | R1.Bbr26IP         | (GGCGCC)                                      |
|                    | RM8  | DRBB26_0207    | 305  | R  | II           | R2.Bbr26IP         | (GGCGCC)                                      |
|                    | RM8  | DRBB26_0208    | 392  | M  | II           | M.Bbr26I           | GG <sup>m5</sup> C <u>G</u> CC                |
|                    | RM12 | DRBB26_1110    | 349  | M  | II           | M.Bbr26II          | RT <sup>m5</sup> C <u>G</u> AY                |
|                    | RM12 | DRBB26_1111    | 684  | R  | II           | Bbr26IIP           | (RTCGAY)                                      |
|                    | RM2b | DRBB26_1520    | 1096 | R  | I            | Bbr26ORF1523P      | -                                             |
|                    | RM2b | DRBB26_1522    | 406  | S  | I            | S1.Bbr26ORF1523P   | ?                                             |
|                    | RM2b | DRBB26_1523    | 855  | M  | I gamma      | M.Bbr26ORF1523P    | G <sup>m6</sup> ACNNNNNNNCAT <u>Y</u>         |
|                    | RM2b | DRBB26_1524    | 280  | S  | I            | S2.Bbr26ORF1523P   | ?                                             |
|                    | RM2b | DRBB26_1528    | 232  | S  | I            | S3.Bbr26ORF1523P   | ?                                             |
| <b>DRBB27</b>      | RM16 | DRBB27_0893    | 910  | RM | II G         | BbrBB27ORF893P     | -                                             |



|                 |                 |                 |      |   |                  |                  |                                |
|-----------------|-----------------|-----------------|------|---|------------------|------------------|--------------------------------|
| <b>DRBB28</b>   | RM4             | DRBB28_0014     | 231  | M | II               | M.Bbr28II        | RG <sup>m6</sup> ATCY          |
|                 | RM4             | DRBB28_0015     | 252  | R | II               | Bbr28IIP         | (RGATCY)                       |
|                 | RM8             | DRBB28_0217     | 263  | R | II               | R1.Bbr28ORF222P  | (GGCGCC)                       |
|                 | RM8             | DRBB28_0221     | 305  | R | II               | R2.Bbr28ORF222P  | (GGCGCC)                       |
|                 | RM8             | DRBB28_0222     | 392  | M | II               | M.Bbr28IV        | GG <sup>m5</sup> CGCC          |
|                 | RM12            | DRBB28_1199     | 349  | M | II               | M.Bbr28III       | RT <sup>m5</sup> CGAY          |
|                 | RM12            | DRBB28_1200     | 684  | R | II               | Bbr28IIIP        | (RTCGAY)                       |
|                 | RM2g            | DRBB28_1641     | 1096 | R | I                | Bbr28IP          | (RAYCNNNNNNNTRCC)              |
|                 | RM2g            | DRBB28_1643     | 384  | S | I                | S1.Bbr28I        | RAYCNNNNNNNTRCC                |
|                 | RM2g            | DRBB28_1644     | 855  | M | I gamma          | M.Bbr28I         | R <sup>m6</sup> AYCNNNNNNNTRCC |
|                 | RM2g            | DRBB28_1645     | 280  | S | I                | S2.Bbr28IP       | -                              |
| RM2g            | DRBB28_1648     | 232             | S    | I | S3.Bbr28IP       | -                |                                |
| <b>017W4-39</b> | RM8             | BB017W439A_0210 | 263  | R | II               | R1.Bbr17IIP      | (GGCGCC)                       |
|                 | RM8             | BB017W439A_0214 | 305  | R | II               | R2.Bbr17IIP      | (GGCGCC)                       |
|                 | RM8             | BB017W439A_0215 | 392  | M | II               | M.Bbr17II        | GG <sup>m5</sup> CGCC          |
|                 | RM7             | BB017W439A_1170 | 422  | R | II               | Bbr17IP          | (CCWGG)                        |
|                 | RM7             | BB017W439A_1171 | 323  | M | II               | M.Bbr17I         | C <sup>m5</sup> CWGG           |
|                 | RM2d            | BB017W439A_1489 | 1096 | R | I                | Bbr17ORF1492P    | -                              |
|                 | RM2d            | BB017W439A_1491 | 392  | S | I                | S1.Bbr17ORF1492P | ?                              |
|                 | RM2d            | BB017W439A_1492 | 855  | M | I gamma          | M.Bbr17ORF1492P  | <sup>m6</sup> AGCNNNNNGTC      |
|                 | RM2d            | BB017W439A_1493 | 280  | S | I                | S2.Bbr17ORF1492P | ?                              |
| RM2d            | BB017W439A_1494 | 169             | S    | I | S3.Bbr17ORF1492P | ?                |                                |
| <b>082W4-8</b>  | RM8             | BB082W48_0219   | 263  | R | II               | R1.Bbr82ORF224P  | (GGCGCC)                       |
|                 | RM8             | BB082W48_0223   | 305  | R | II               | R2.Bbr82ORF224P  | (GGCGCC)                       |
|                 | RM8             | BB082W48_0224   | 392  | M | II               | M.Bbr82ORF224P   | (GG <sup>m5</sup> CGCC)        |
|                 | RM3             | BB082W48_0377   | 431  | R | II               | Bbr82ORF378P     | (GATC)                         |
|                 | RM3             | BB082W48_0378   | 276  | M | II alpha         | M.Bbr82II        | G <sup>m6</sup> ATC            |
|                 | RM7             | BB082W48_1165   | 480  | R | II               | Bbr82ORF1165P    | -                              |
|                 | RM2e            | BB082W48_1475   | 1096 | R | I                | Bbr82IP          | (GACNNNNNNNRTTG)               |

|                  |      |                 |      |    |                |                   |                                       |
|------------------|------|-----------------|------|----|----------------|-------------------|---------------------------------------|
|                  | RM2e | BB082W48_1477   | 399  | S  | I              | S1.Bbr82I         | GACNNNNNNRRTTG                        |
|                  | RM2e | BB082W48_1478   | 855  | M  | I gamma        | M.Bbr82I          | G <sup>m6</sup> ACNNNNNNR <u>T</u> TG |
|                  | RM2e | BB082W48_1479   | 280  | S  | I              | S2.Bbr82IP        | -                                     |
| <b>139W4-23</b>  | RM8  | BB139W423_0233  | 263  | R  | II             | R1.Bbr139ORF238P  | (GGCGCC)                              |
|                  | RM8  | BB139W423_0237  | 305  | R  | II             | R2.Bbr139ORF238P  | (GGCGCC)                              |
|                  | RM8  | BB139W423_0238  | 392  | M  | II             | M.Bbr139ORF238P   | (GG <sup>m5</sup> CGCC)               |
| <b>180W8-3</b>   | RM8  | BB180W83_0208   | 263  | R  | II             | R1.Bbr180IIP      | (GGCGCC)                              |
|                  | RM8  | BB180W83_0212   | 305  | R  | II             | R2.Bbr180IIP      | (GGCGCC)                              |
|                  | RM8  | BB180W83_0213   | 392  | M  | II             | M.Bbr180II        | GG <sup>m5</sup> CGCC                 |
|                  | RM7  | BB180W83_1170   | 422  | R  | II             | Bbr180IP          | CCWGG                                 |
|                  | RM7  | BB180W83_1171   | 323  | M  | II             | M.Bbr180I         | C <sup>m5</sup> CWGG                  |
|                  | MT7  | BB180W83_0927   | 767  | M  | I              | M.Bbr180ORF927P   | -                                     |
| <b>215W4-47a</b> | MT4  | BB215W447A_1044 | 288  | M  | II beta        | M.Bbr215ORF1044P  | -                                     |
|                  | RM13 | BB215W447A_1062 | 932  | RM | II G,gamma     | Bbr215II          | GAGG <sup>m6</sup> AC                 |
|                  | MT3  | BB215W447A_1258 | 327  | M  | II             | M.Bbr215ORF1258P  | -                                     |
|                  | MT5  | BB215W447A_1218 | 413  | M  | II beta        | M.Bbr215ORF1218P  | -                                     |
|                  | MT2  | BB215W447A_1210 | 913  | M  | II             | M.Bbr215ORF1210P  | -                                     |
|                  | MT1  | BB215W447A_1576 | 160  | M  | II gamma       | M.Bbr215ORF1576P  | -                                     |
|                  | MT6  | BB215W447A_1561 | 152  | M  | II             | M.Bbr215ORF1561P  | -                                     |
|                  | RM2f | BB215W447A_1727 | 1096 | R  | I              | Bbr215ORF1730P    | -                                     |
|                  | RM2f | BB215W447A_1729 | 413  | S  | I              | S1.Bbr215ORF1730P | ?                                     |
|                  | RM2f | BB215W447A_1730 | 855  | M  | I gamma        | M.Bbr215ORF1730P  | G <sup>m6</sup> AGNNNNNR <u>T</u> TTC |
|                  | RM2f | BB215W447A_1731 | 280  | S  | I              | S2.Bbr215ORF1730P | ?                                     |
|                  | RM2f | BB215W447A_1734 | 232  | S  | I              | S3.Bbr215ORF1730P | ?                                     |
|                  | RM15 | BB215W447A_1808 | 1110 | RM | II G, S, alpha | Bbr215I           | GGCG <sup>m6</sup> AG                 |
| <b>JCM7017</b>   | MT9  | B7017_0097      | 1068 | R  | IV             | Bbr7017ORF97P     | -                                     |
|                  | RM5  | B7017_0735      | 776  | M  | II             | M.Bbr7017I        | GG <sup>m6</sup> A <u>T</u> C         |
|                  | RM5  | B7017_0736      | 567  | R  | II             | Bbr7017IP         | (GGATC)                               |
|                  | RM15 | B7017_1663      | 944  | RM | IIG            | Bbr7017ORF1663P   | GGRC <sup>m6</sup> AG                 |

|      |             |     |    |      |                  |                       |
|------|-------------|-----|----|------|------------------|-----------------------|
| MT10 | pl7017_0033 | 240 | M  | II   | M.Bbr7017ORF33P  | -                     |
| MT11 | pl7017_0034 | 152 | M  | II   | M.Bbr7017ORF34P  | -                     |
| RM17 | pl7017_0142 | 351 | RM | II   | Bbr7017ORF142P   | -                     |
| RM17 | pl7017_0143 | 383 | RM | II   | Bbr7017ORF142P   | -                     |
| RM17 | pl7017_0144 | 193 | RM | II   | Bbr7017ORF142P   | -                     |
| RM13 | pl7017_0174 | 931 | RM | IIIG | Bbr7017ORF174P   | CGGG <sup>m6</sup> AG |
| MT12 | pl7017_0197 | 353 | M  | II   | M.Bbr7017ORF197P | -                     |

---

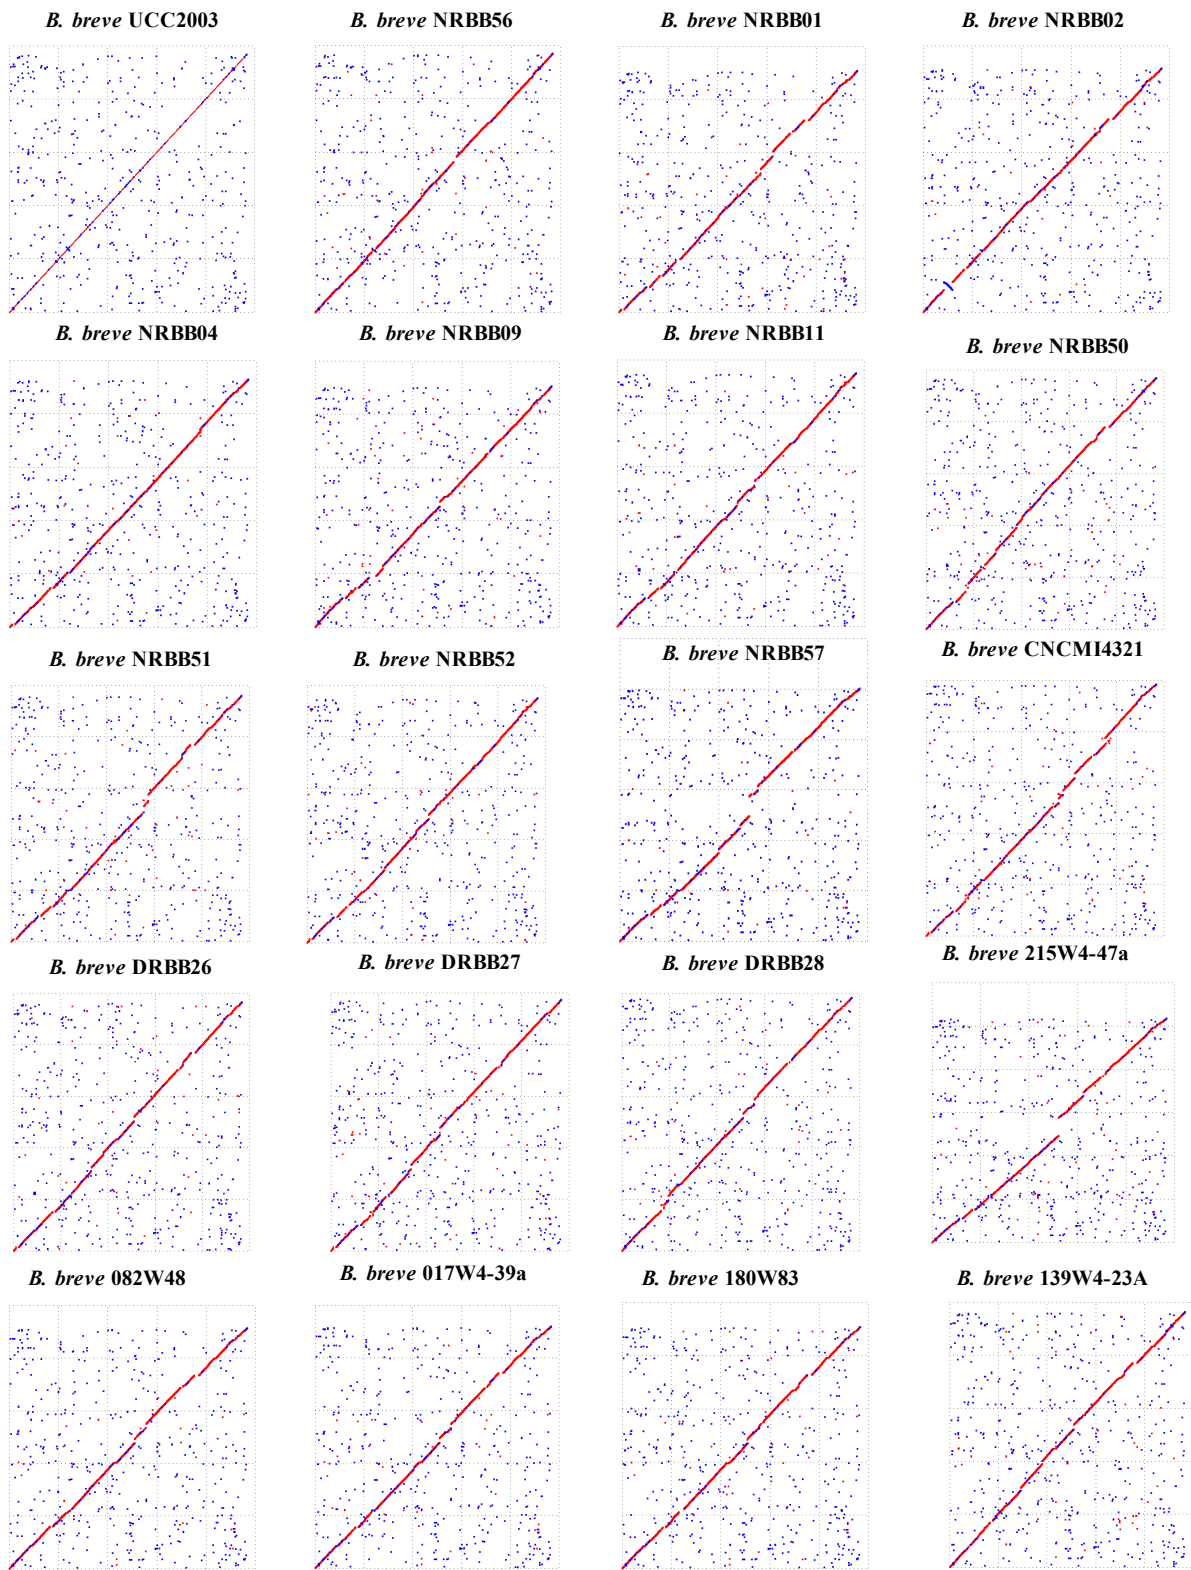

**Figure S1**

**UCC2003 vs NCIMB 8809**

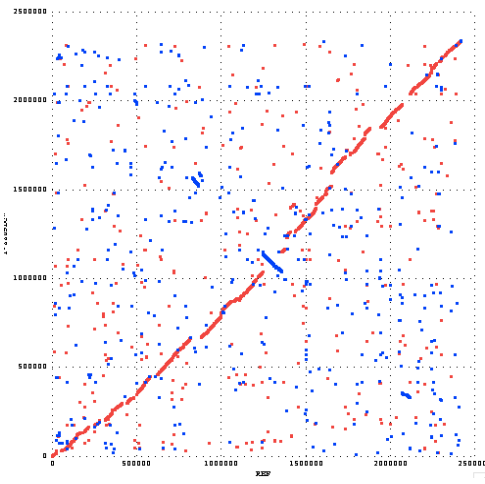

**NCIMB8809 vs NCC2705**

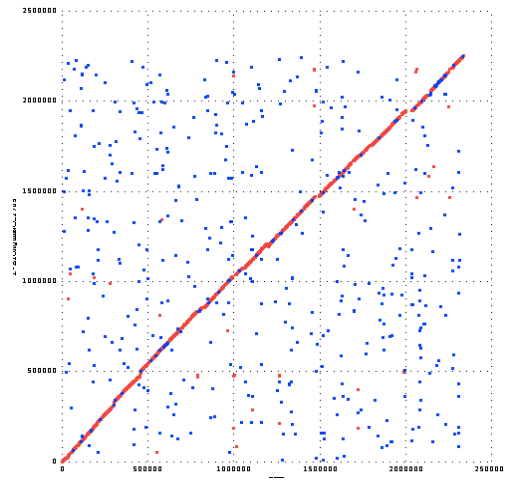

**NCIMB 8809 vs JCM1217**

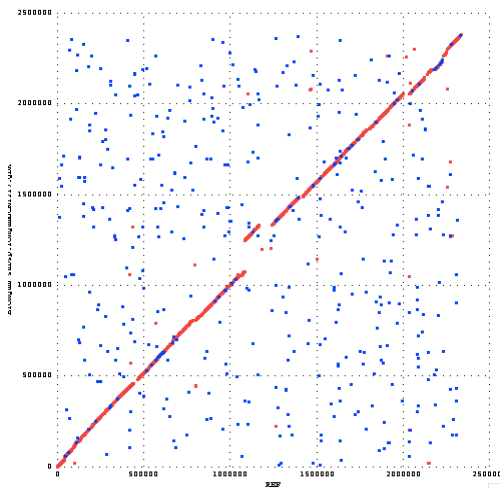

**NCIMB 8809 vs AH1206**

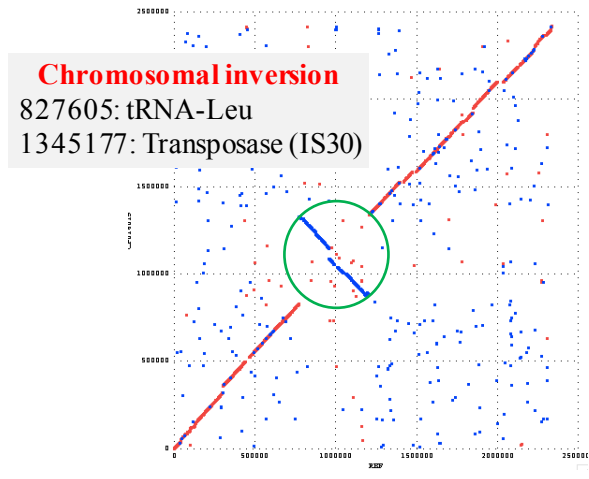

**NCIMB 8809 vs CCUG 30698**

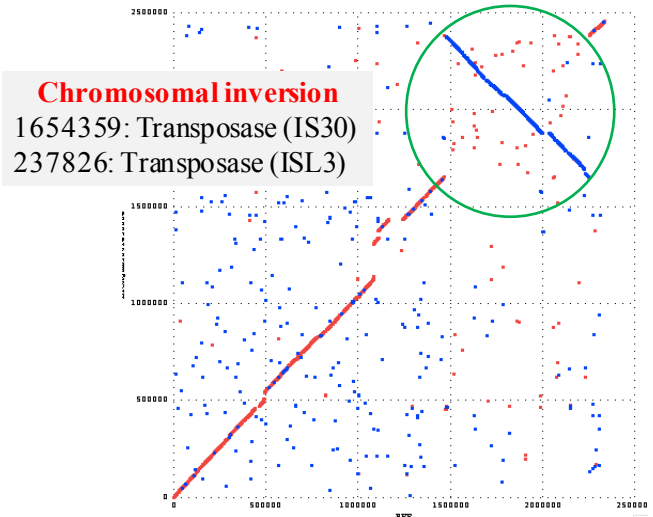

**NCIMB8809 vs F8**

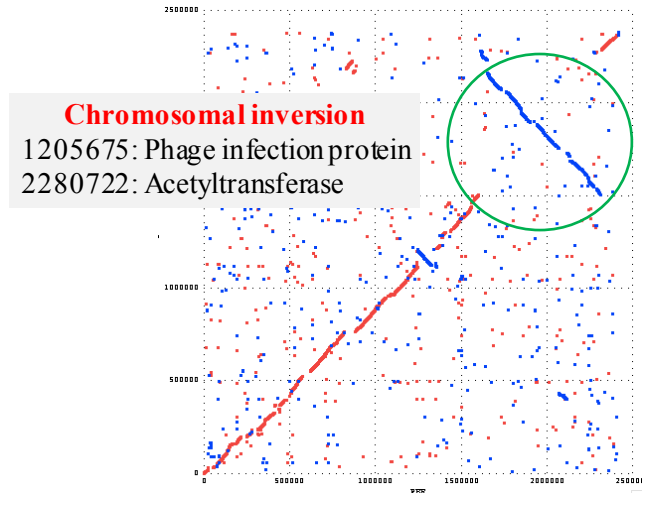

**Figure S2**

a)

RM8-COG

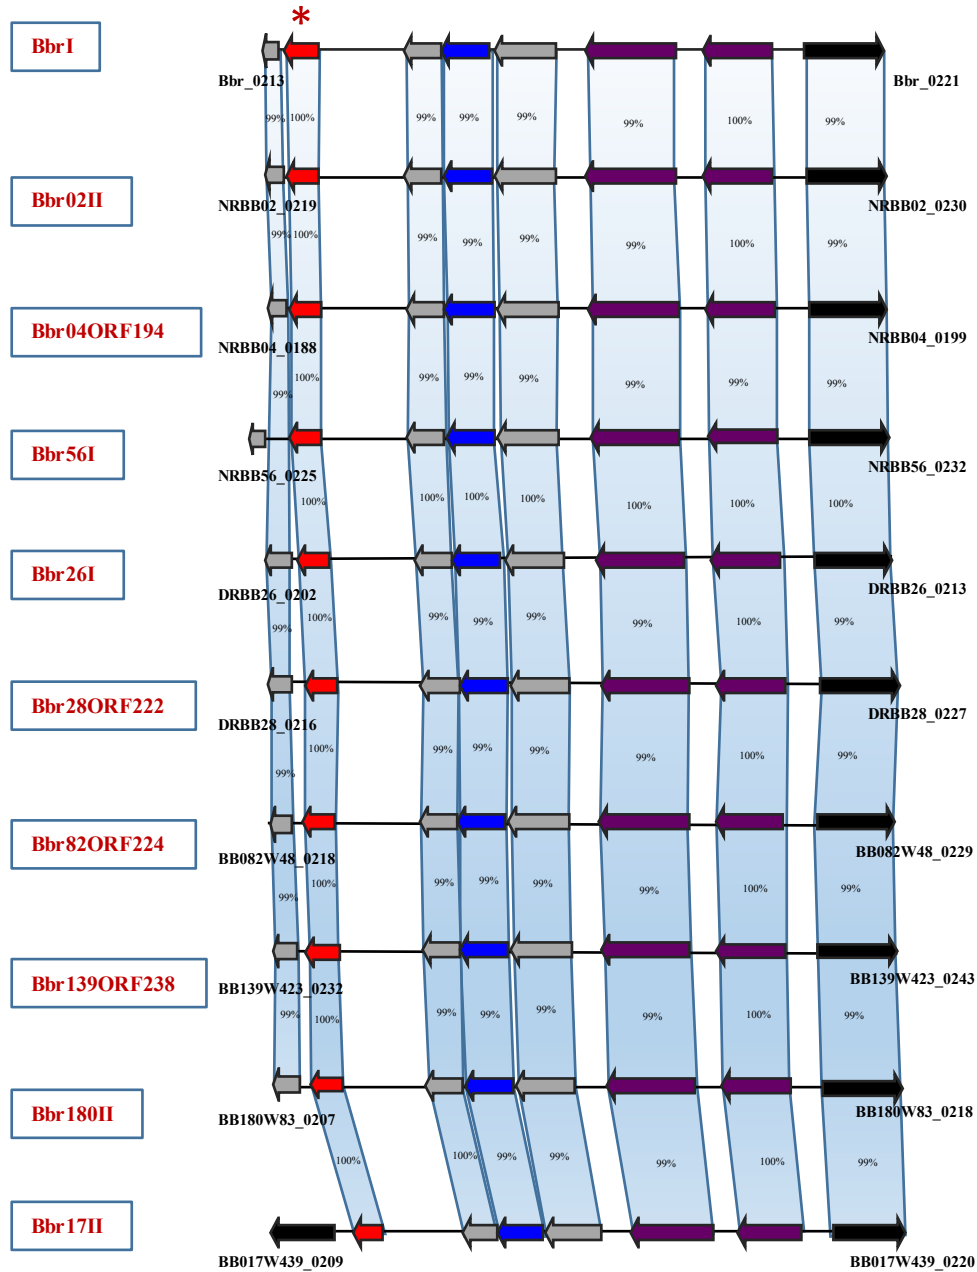

b)

RM7-COG

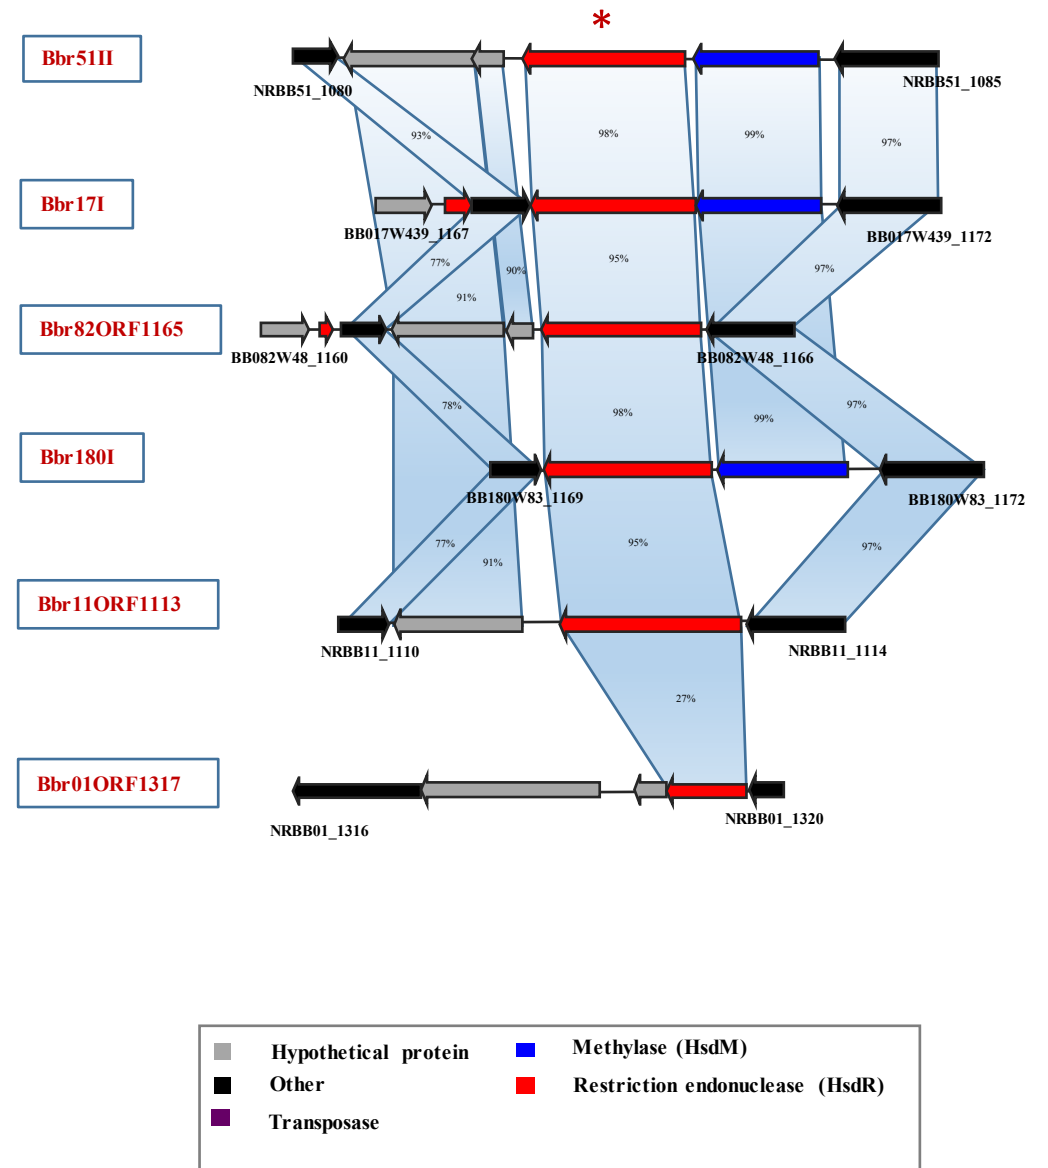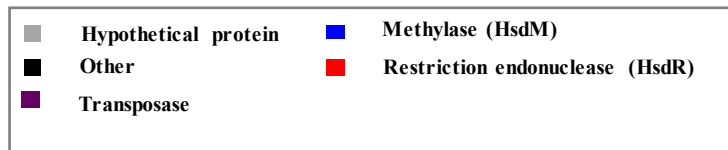

Figure S3

*B.breve* NRBB11

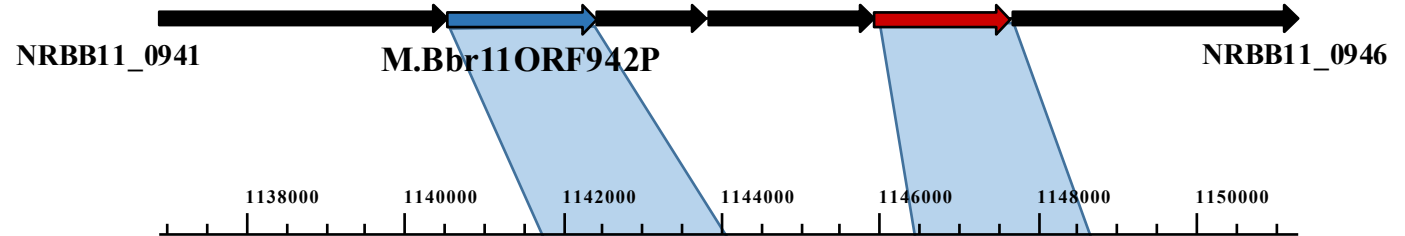

56 %

59 %

*B.breve* NRBB57

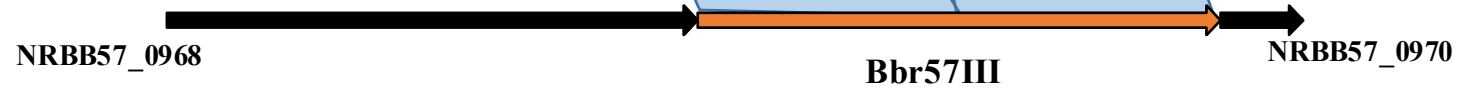

Figure S4

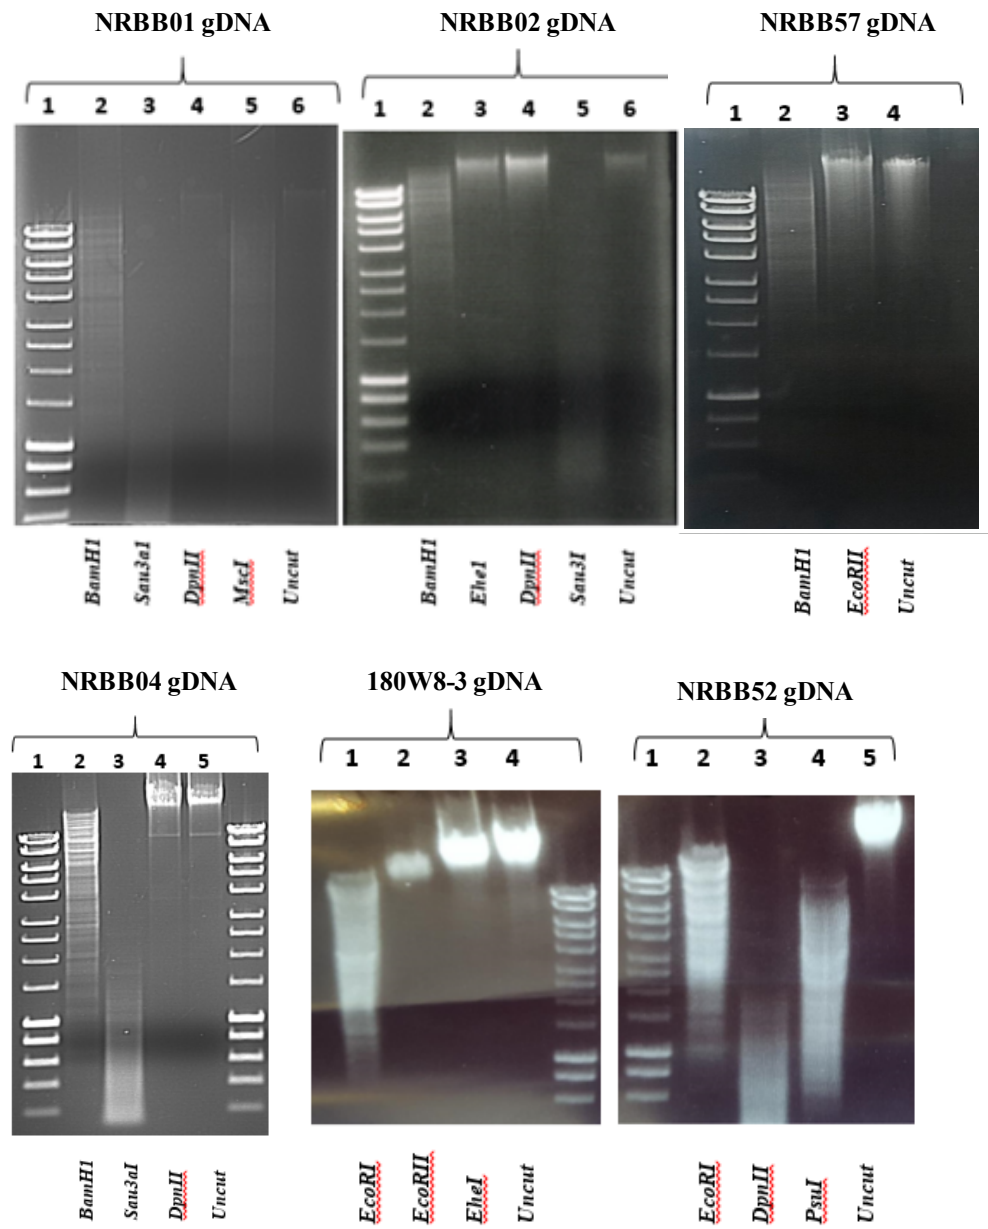

Figure S5
